# Supplementary figures and images for: In vivo experiments do not support the charge zipper model for Tat translocase assembly
Source: eLife journal article supplement (doi:10.7554/elife.30127), 2017-08-31

A

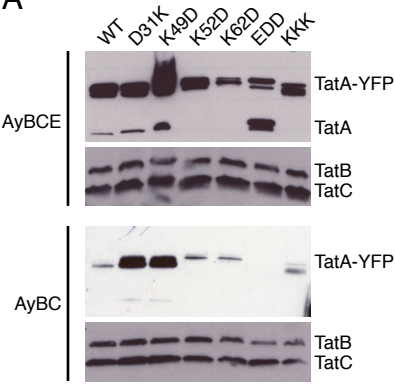

B

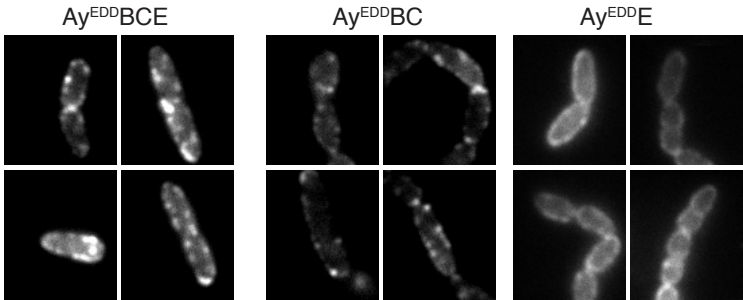

Supplement: supp [file elife-30127-supp-v1.zip]
